# Supplementary figures and images for: Functional cell types in the mouse superior colliculus
Source: eLife journal article supplement (doi:10.7554/elife.82367), 2023-03-31

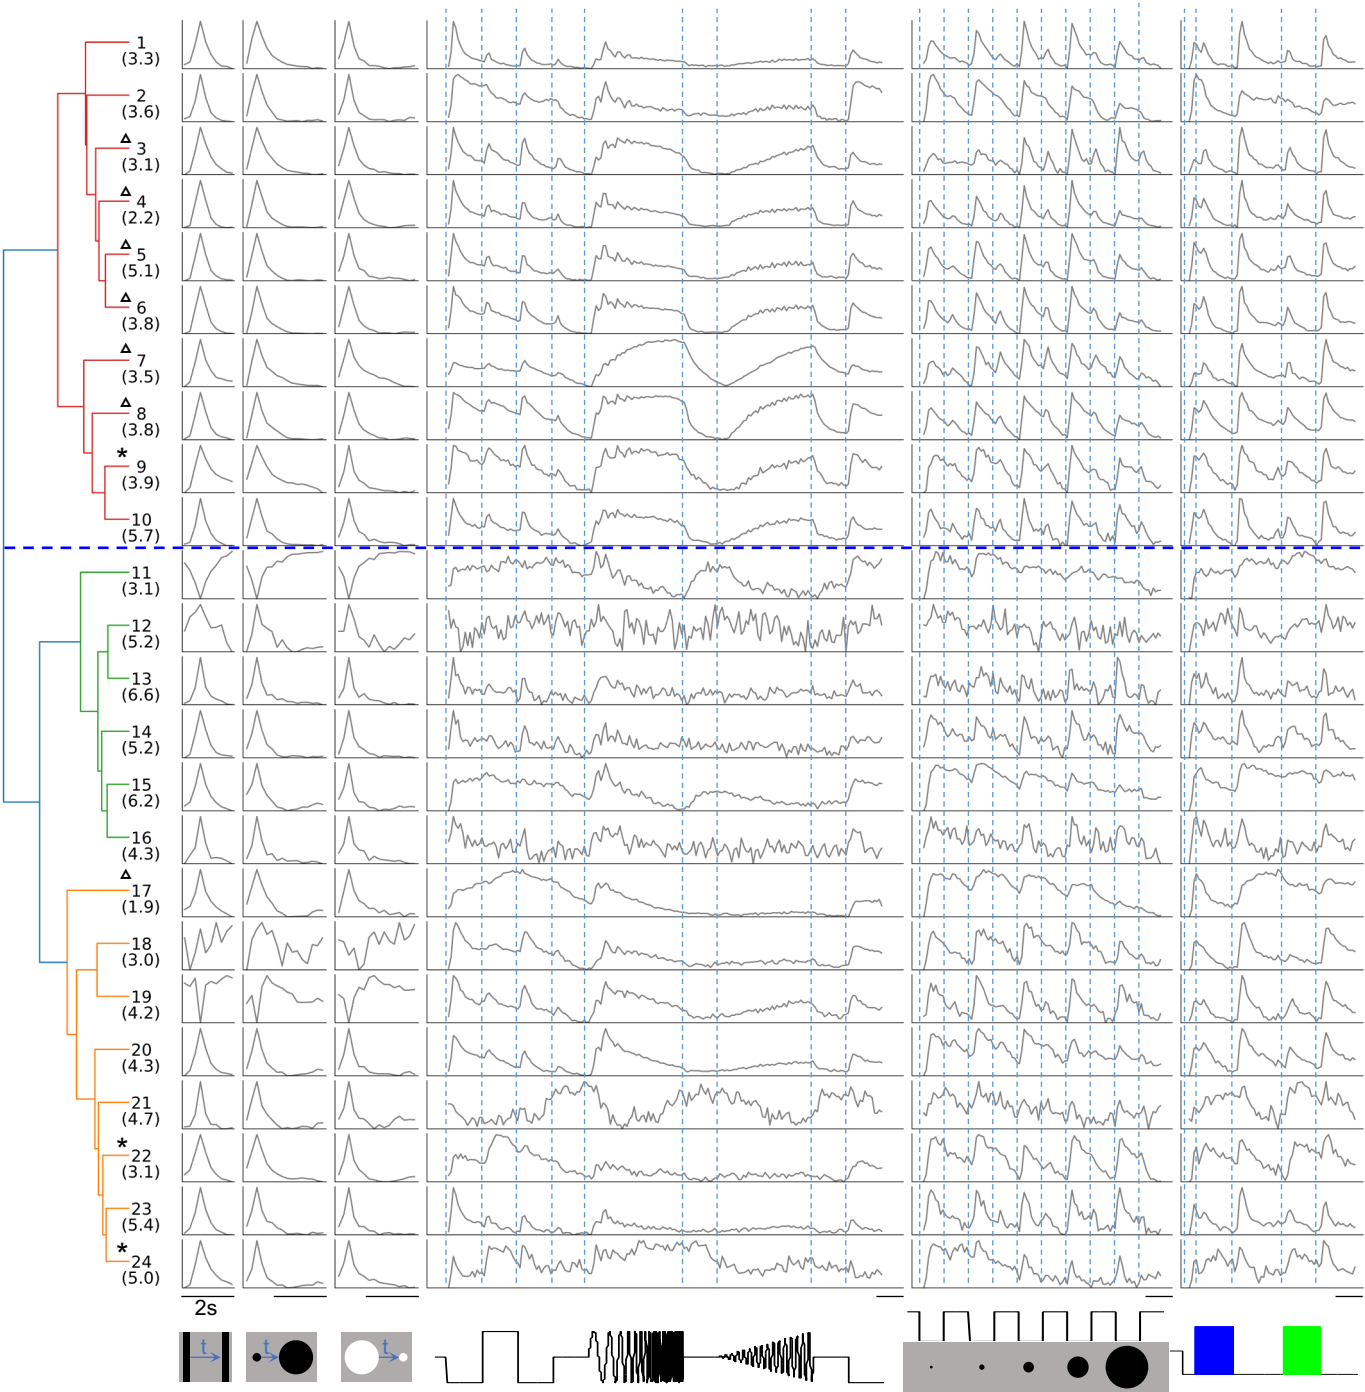

Supplement: supp [file elife-82367-supp-v1.zip]

**A**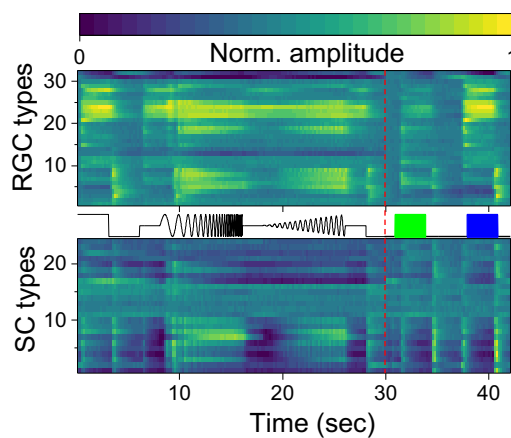**B**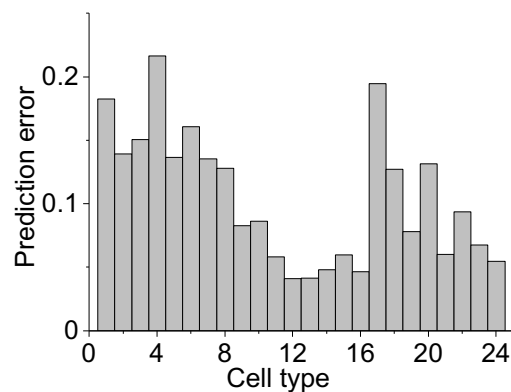**C**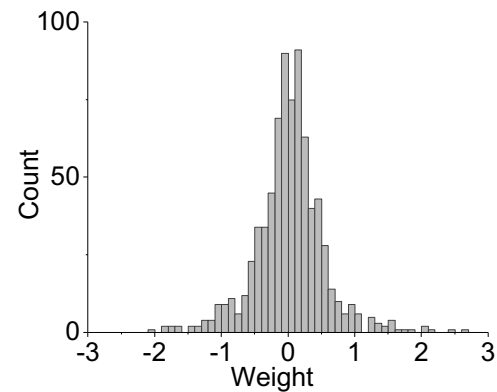**D**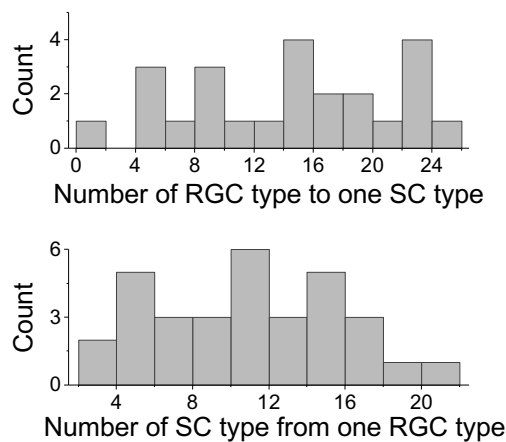**E**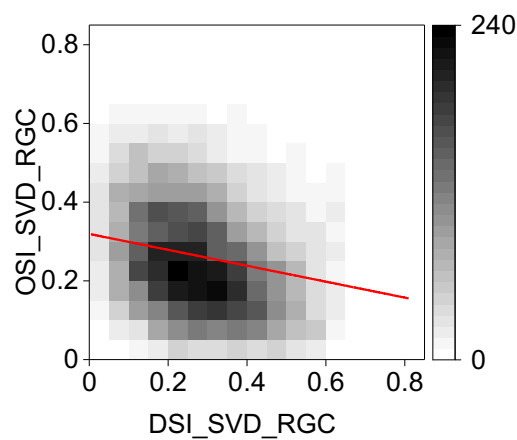**F**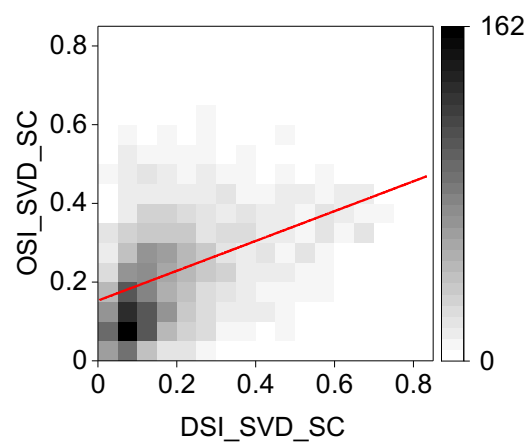**G**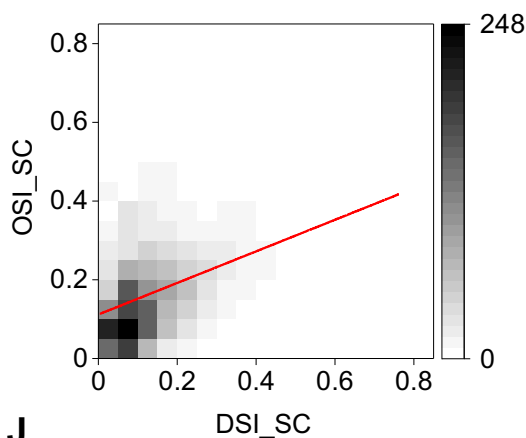**H**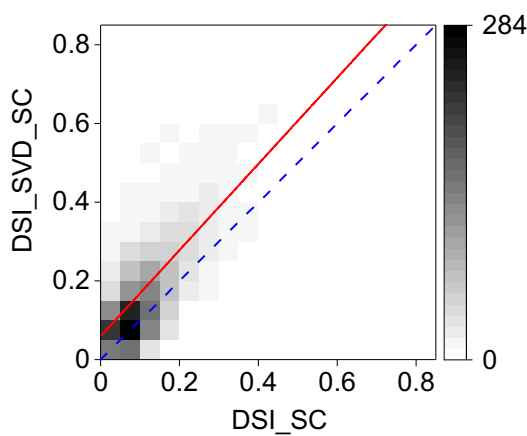**I**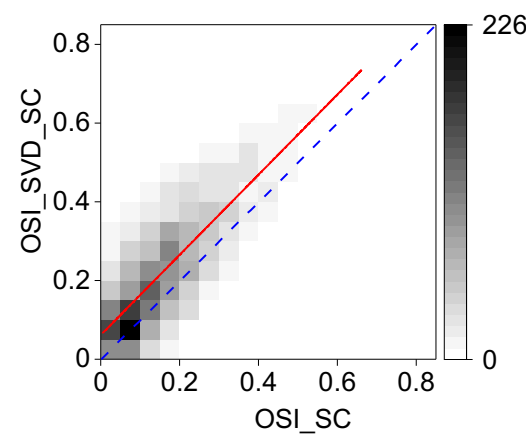**J**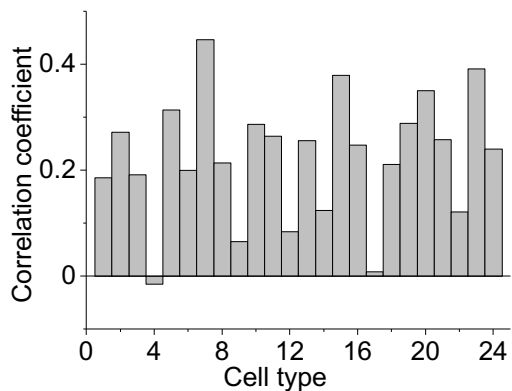

Supplement: supp [file elife-82367-supp-v1.zip]

**A**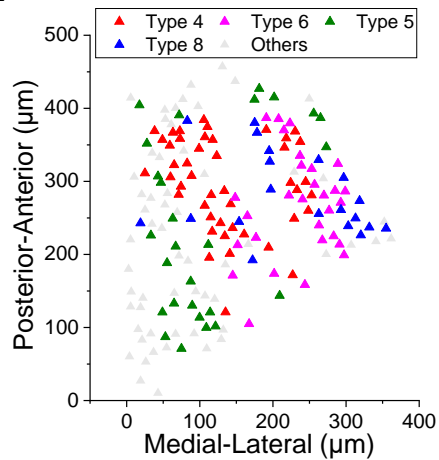**B**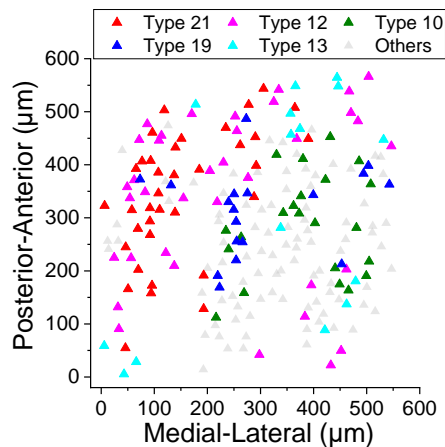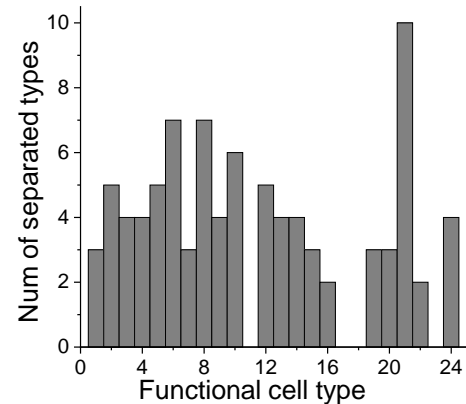**C**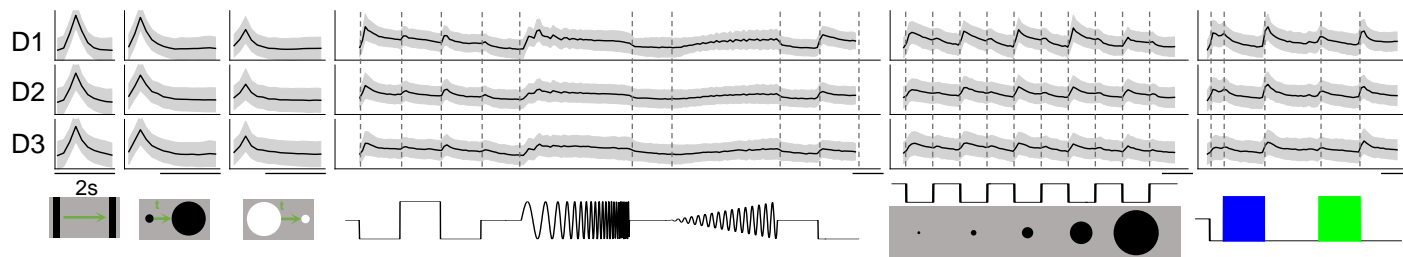**D**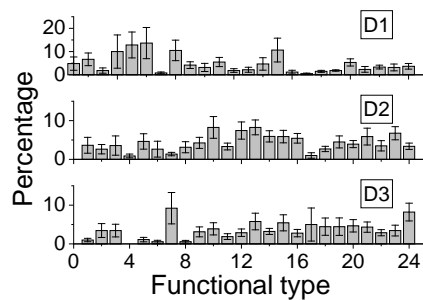

Supplement: supp [file elife-82367-supp-v1.zip]

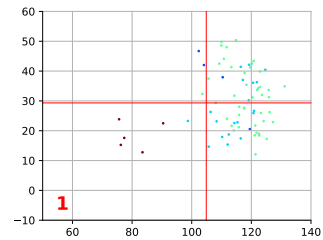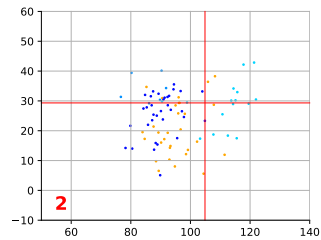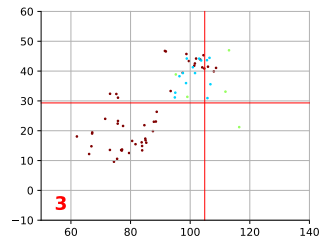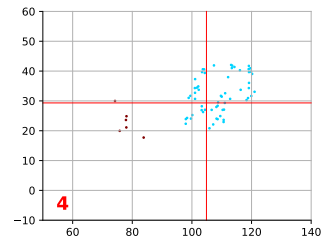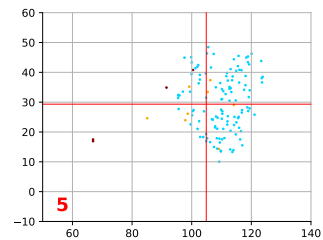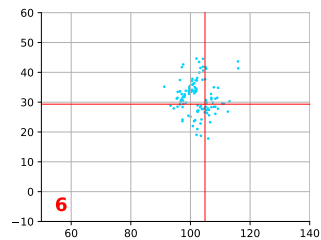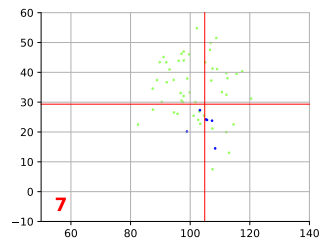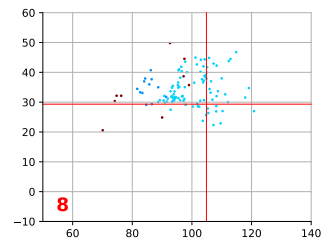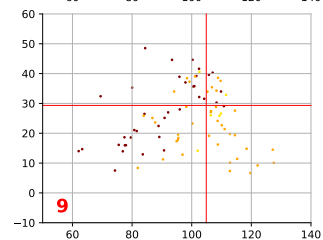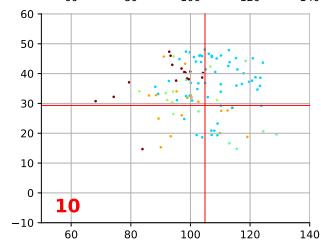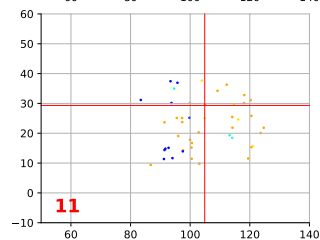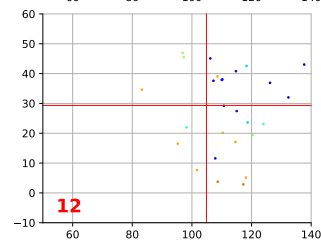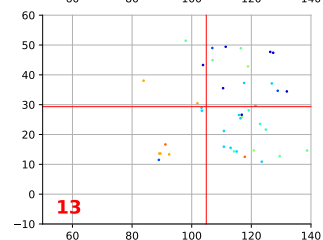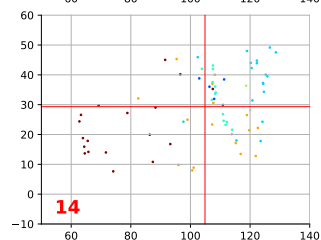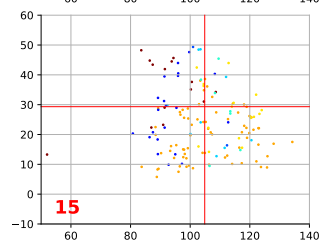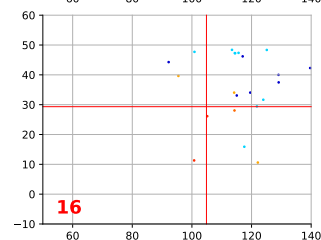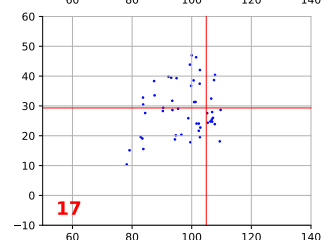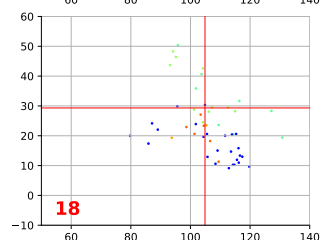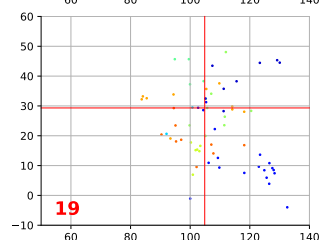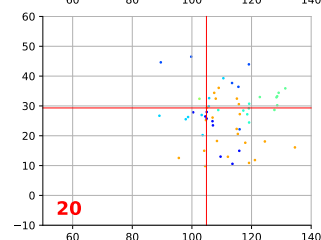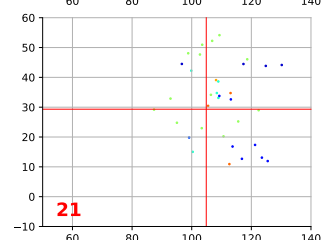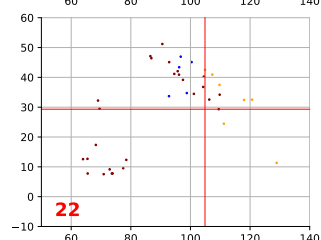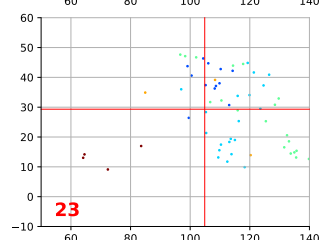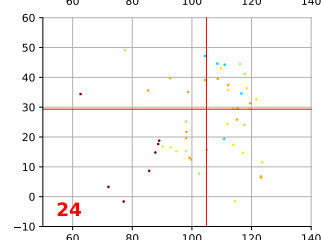

Elevation (deg)

Azimuth (deg)

Supplement: supp [file elife-82367-supp-v1.zip]

**A**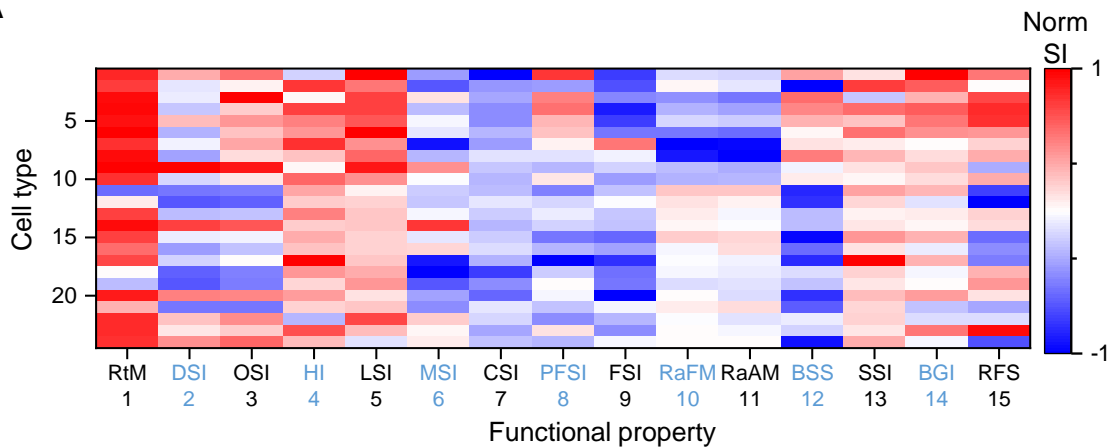**B**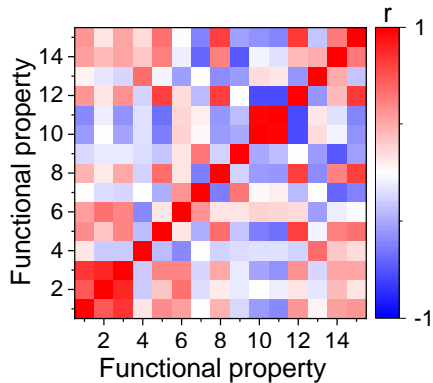**C**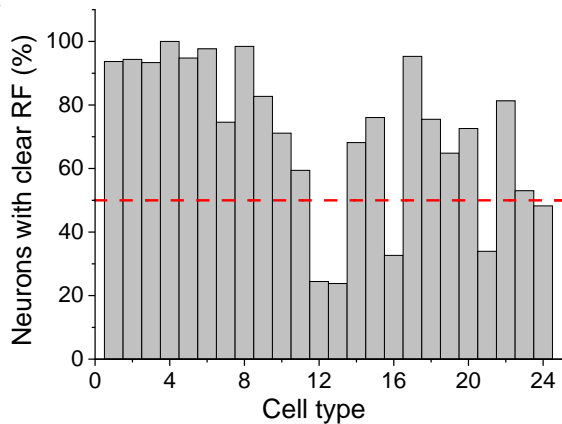

Supplement: supp [file elife-82367-supp-v1.zip]

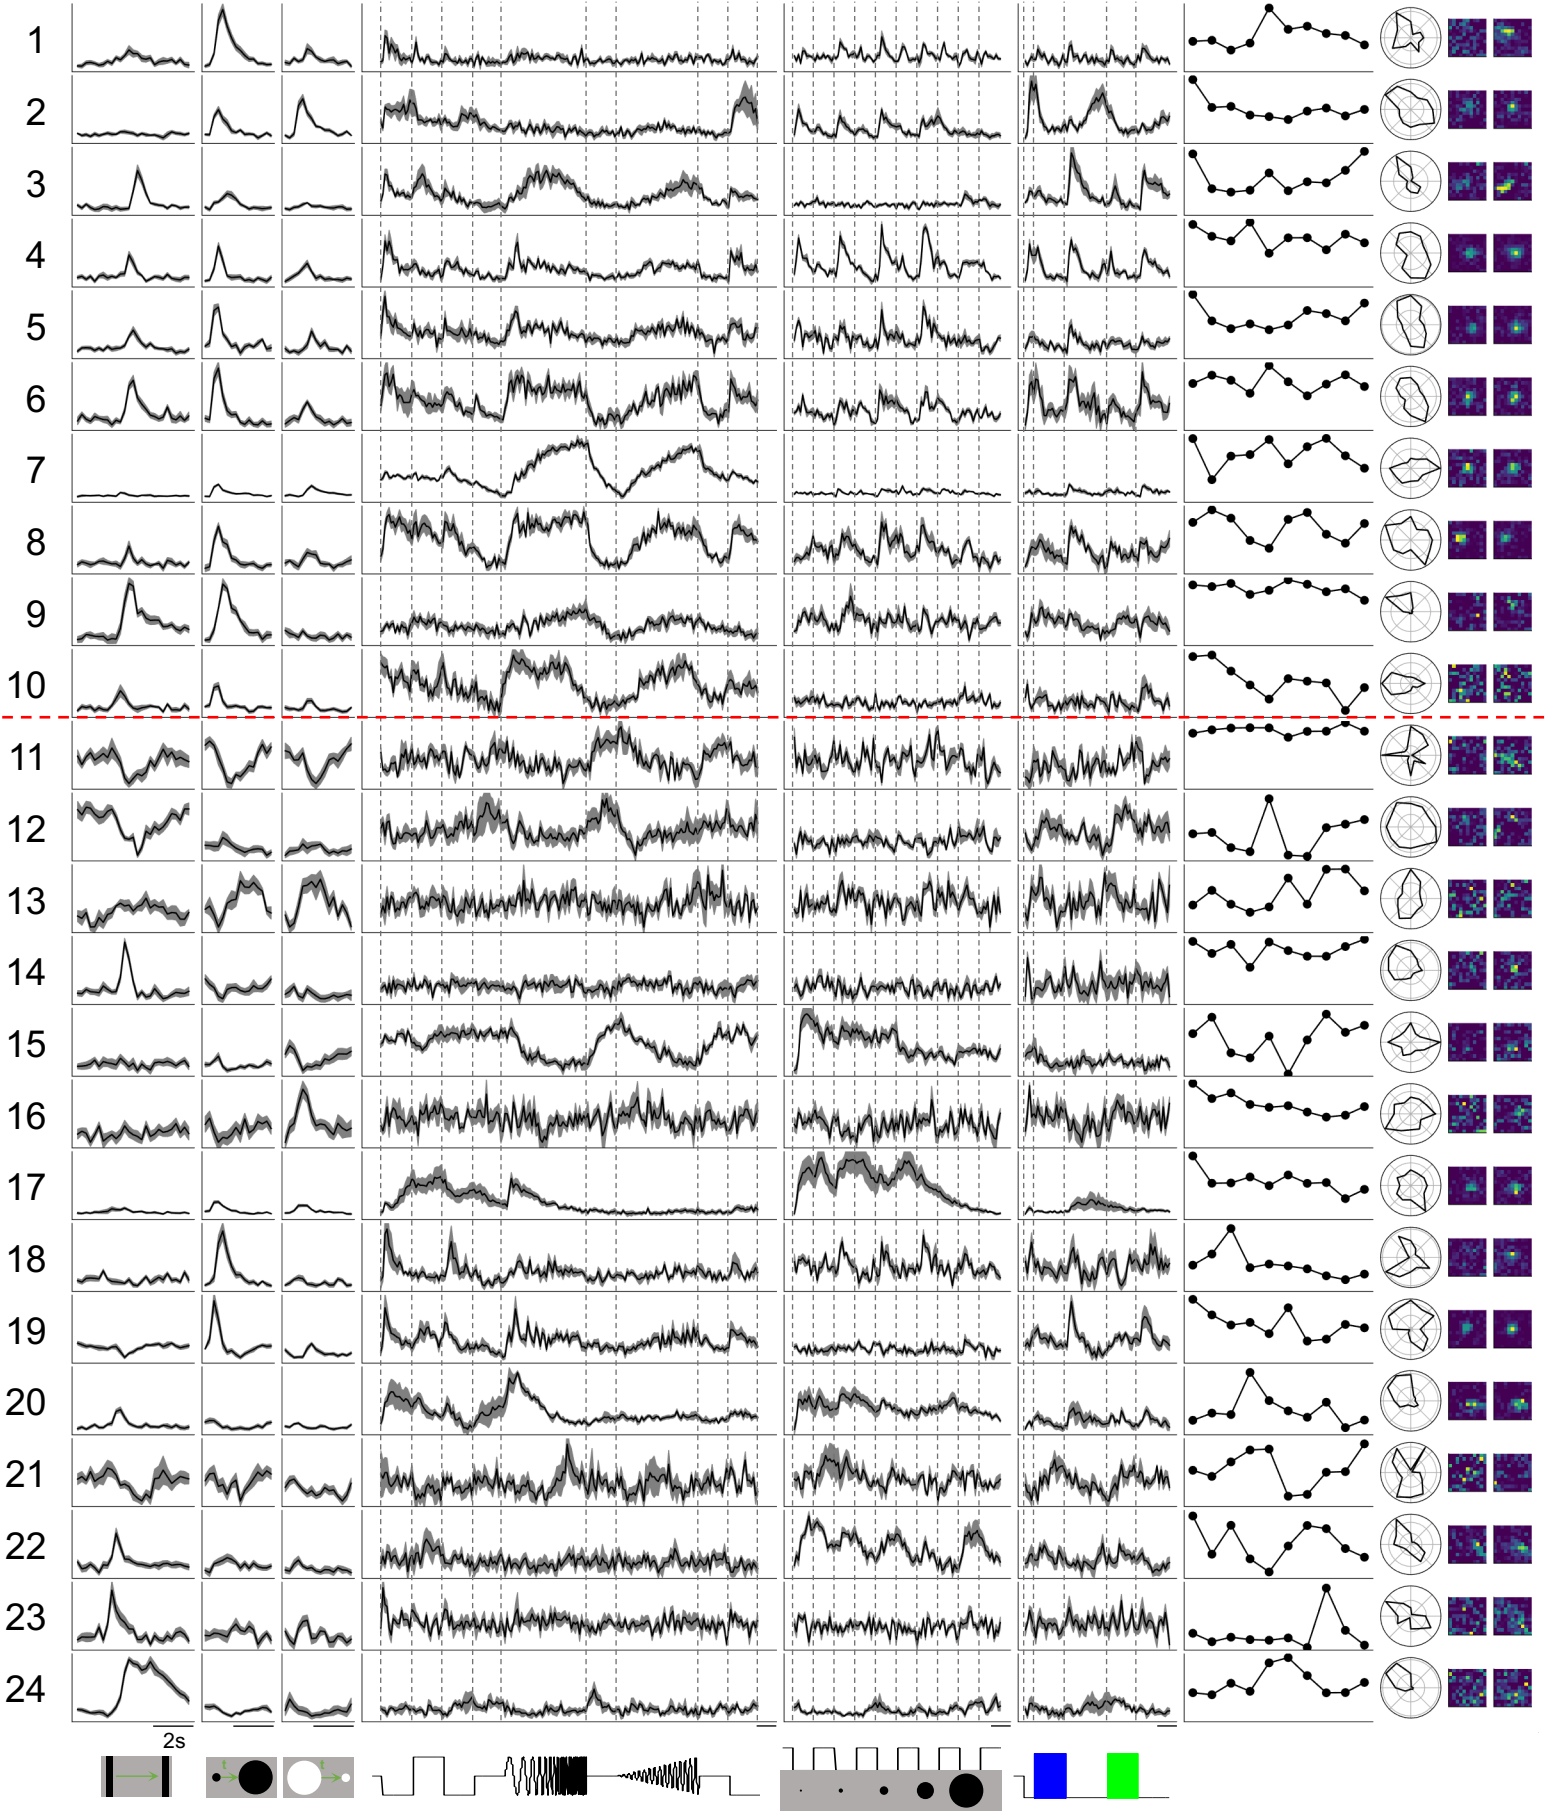

Supplement: supp [file elife-82367-supp-v1.zip]

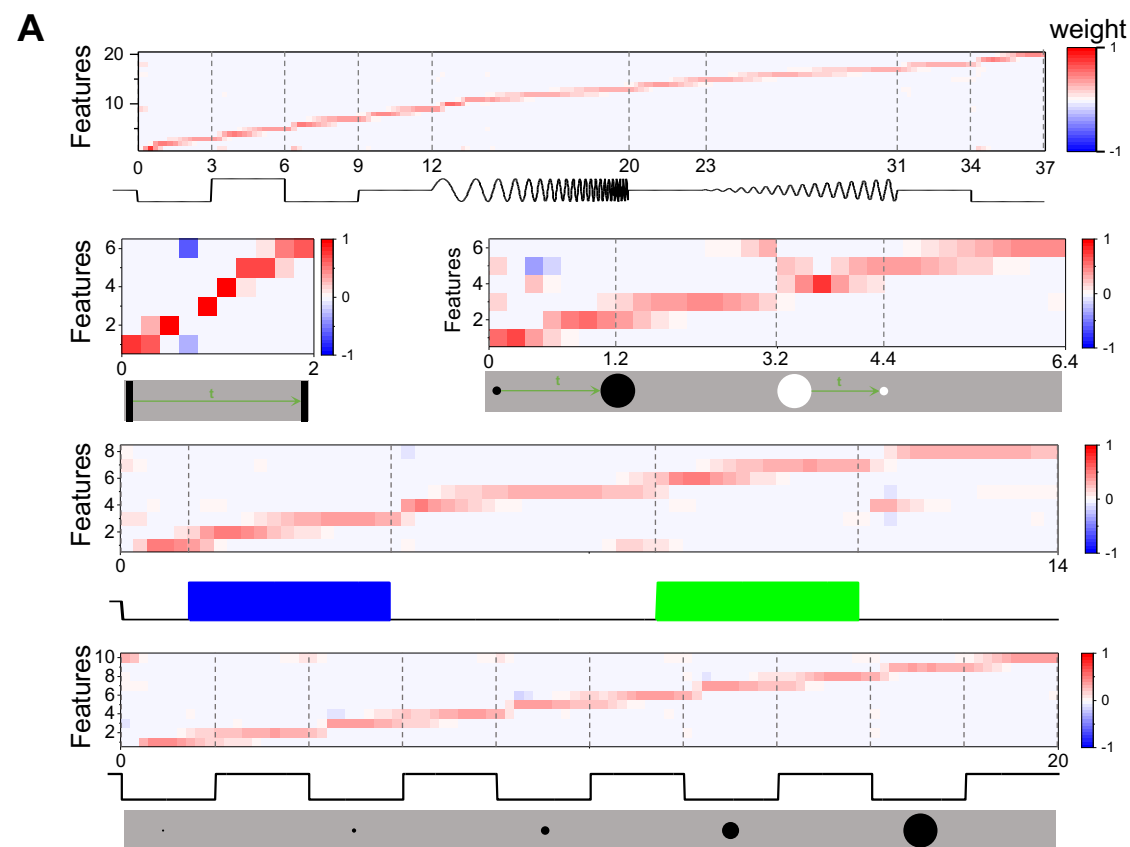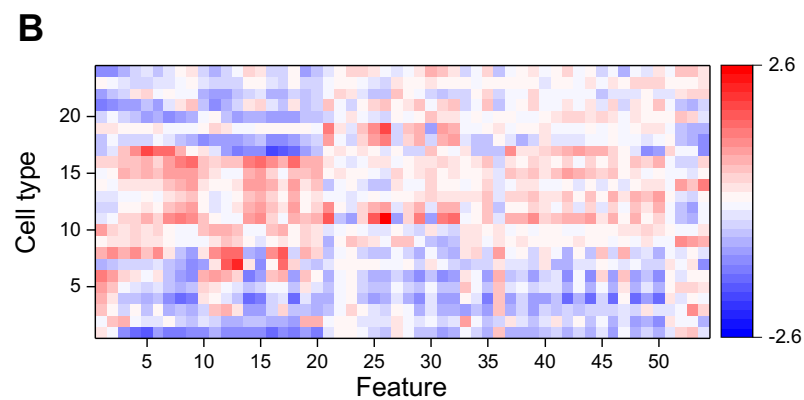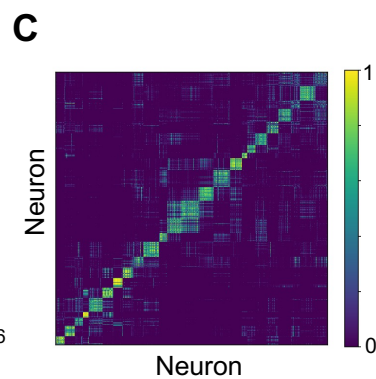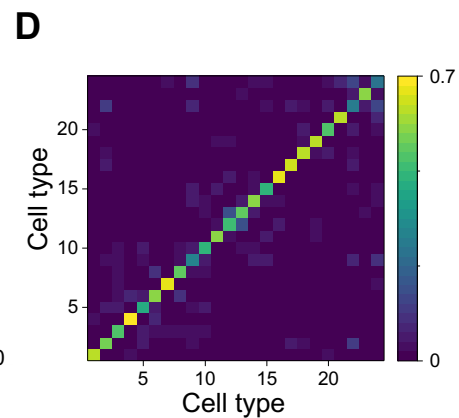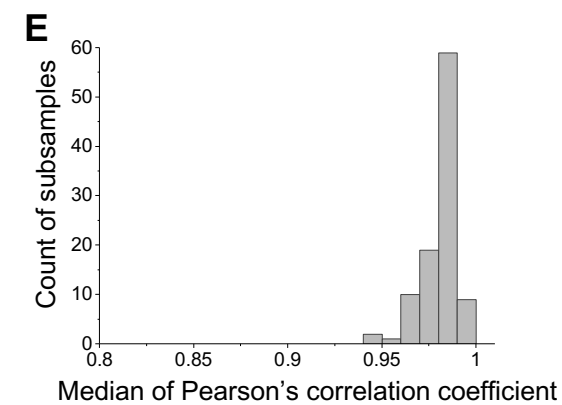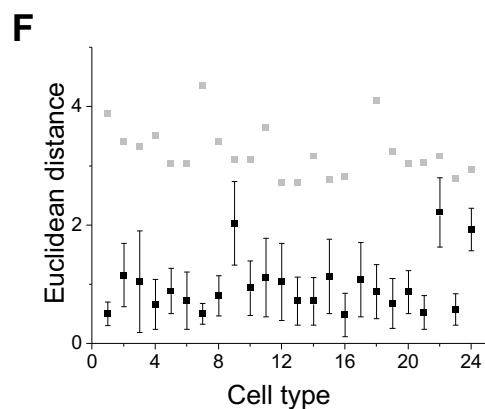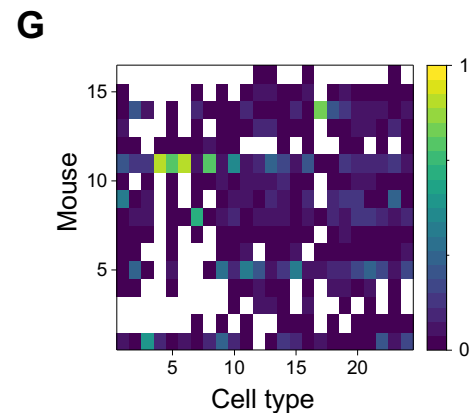

Supplement: supp [file elife-82367-supp-v1.zip]
